# Supplementary material for: Community- and Patient-Partner Engagement in Women’s Cardiovascular Disease Research: A Rapid Review of the Evidence
Source: PubMed Central journal article supplement — CJC Open. 2023 Dec 23;6(2Part B):485–502. doi: 10.1016/j.cjco.2023.12.016 (PMC10935688; doi:10.1016/j.cjco.2023.12.016), 2023-12-23
Supplement: mmc1.pdf [file mmc1.pdf]

**Supplemental Table S1. PRISMA-S Checklist**

| Section/topic                          | #  | Checklist item                                                                                                                                                                                                                                                     | Location(s) Reported                          |
|----------------------------------------|----|--------------------------------------------------------------------------------------------------------------------------------------------------------------------------------------------------------------------------------------------------------------------|-----------------------------------------------|
| <b>INFORMATION SOURCES AND METHODS</b> |    |                                                                                                                                                                                                                                                                    |                                               |
| Database name                          | 1  | Name each individual database searched, stating the platform for each.                                                                                                                                                                                             | Search methods                                |
| Multi-database searching               | 2  | If databases were searched simultaneously on a single platform, state the name of the platform, listing all of the databases searched.                                                                                                                             | Search methods                                |
| Study registries                       | 3  | List any study registries searched.                                                                                                                                                                                                                                | Not applicable                                |
| Online resources and browsing          | 4  | Describe any online or print source purposefully searched or browsed (e.g., tables of contents, print conference proceedings, web sites), and how this was done.                                                                                                   | Not applicable                                |
| Citation searching                     | 5  | Indicate whether cited references or citing references were examined, and describe any methods used for locating cited/citing references (e.g., browsing reference lists, using a citation index, setting up email alerts for references citing included studies). | Reference listed of relevant studies reviewed |
| Contacts                               | 6  | Indicate whether additional studies or data were sought by contacting authors, experts, manufacturers, or others.                                                                                                                                                  | Not applicable                                |
| Other methods                          | 7  | Describe any additional information sources or search methods used.                                                                                                                                                                                                | Nil                                           |
| <b>SEARCH STRATEGIES</b>               |    |                                                                                                                                                                                                                                                                    |                                               |
| Full search strategies                 | 8  | Include the search strategies for each database and information source, copied and pasted exactly as run.                                                                                                                                                          | Supplemental Table S3                         |
| Limits and restrictions                | 9  | Specify that no limits were used, or describe any limits or restrictions applied to a search (e.g., date or time period, language, study design) and provide justification for their use.                                                                          | Search methods                                |
| Search filters                         | 10 | Indicate whether published search filters were used (as originally designed or modified), and if so, cite the filter(s) used.                                                                                                                                      | Not applicable                                |
| Prior work                             | 11 | Indicate when search strategies from other literature reviews were adapted or reused for a substantive part or all of the search, citing the previous review(s).                                                                                                   | Not applicable                                |
| Updates                                | 12 | Report the methods used to update the search(es) (e.g., rerunning searches, email alerts).                                                                                                                                                                         | Not applicable                                |

|                         |    |                                                                                                                                    |                                      |
|-------------------------|----|------------------------------------------------------------------------------------------------------------------------------------|--------------------------------------|
| Dates of searches       | 13 | For each search strategy, provide the date when the last search occurred.                                                          | Search methods                       |
| <b>PEER REVIEW</b>      |    |                                                                                                                                    |                                      |
| Peer review             | 14 | Describe any search peer review process.                                                                                           | Search methods                       |
| <b>MANAGING RECORDS</b> |    |                                                                                                                                    |                                      |
| Total Records           | 15 | Document the total number of records identified from each database and other information sources.                                  | Figure 1<br>Supplemental<br>Table S3 |
| Deduplication           | 16 | Describe the processes and any software used to deduplicate records from multiple database searches and other information sources. | Selection of<br>studies              |

PRISMA-S: An Extension to the PRISMA Statement for Reporting Literature Searches in Systematic Reviews  
Rethlefsen ML, Kirtley S, Waffenschmidt S, Ayala AP, Moher D, Page MJ, Koffel JB, PRISMA-S Group.  
Last updated February 27,  
2020.

**Supplemental Table S2.** Community and Patient Partner Engagement in Women’s CVD Research Rapid Review (GRIPP 2-SF)

| <b>Section and Topic</b> | <b>Item</b>                                                                                                                                                                                                                                                                                                                                                                                                                  |
|--------------------------|------------------------------------------------------------------------------------------------------------------------------------------------------------------------------------------------------------------------------------------------------------------------------------------------------------------------------------------------------------------------------------------------------------------------------|
| 1.Aim                    | To scope the body of research where patient partners have been engaged in women’s CVD (IHD, heart failure, stroke) research.                                                                                                                                                                                                                                                                                                 |
| 2.Methods                | Two patient partners collaborated throughout the review, identifying priorities and search terms from a contemporaneous review through to reviewing the manuscript prior to publication. Patient partners are listed as co-authors on the manuscript. Compensation was provided to patient partners using recommendations from the SPOR Chronic Disease Networks and the Primary Integrated Health Care Innovations (PIHCI). |
| 3.Results                | Patient partners will be instrumental in providing other recommendations for sharing and disseminating rapid review findings. This may include co-delivering results via social media, public forums, as well as scientific presentations in which they will be invited to be a co-presenter.                                                                                                                                |
| 4.Discussion             | Co-authors (i.e., patient partners) have collaborated in previous reviews and the principal author (MP) is experienced in involving patient partners in her research.                                                                                                                                                                                                                                                        |
| 5.Reflections            | Patient engagement was embedded as much as possible into the methods of this review. This built on previous collaborations with the same patient partners, noting that the principles of inclusiveness, support, mutual respect, flexibility, accountability, and co-learning was already established between team members/co-authors.                                                                                       |

**Supplemental Table S3. Search Strategies**

| <b>MEDLINE</b>                                                               |                                                                                                                                                                                                                                                                                                                                                                                                                                      |                |
|------------------------------------------------------------------------------|--------------------------------------------------------------------------------------------------------------------------------------------------------------------------------------------------------------------------------------------------------------------------------------------------------------------------------------------------------------------------------------------------------------------------------------|----------------|
| MEDLINE(R) ALL 1946 to current; Platform: Ovid; Date Searched: June 20, 2023 |                                                                                                                                                                                                                                                                                                                                                                                                                                      |                |
| <b>#</b>                                                                     | <b>Searches</b>                                                                                                                                                                                                                                                                                                                                                                                                                      | <b>Results</b> |
| 1                                                                            | patient participation/ or consumer participation/ or patient advocacy/ or consumer advocacy/                                                                                                                                                                                                                                                                                                                                         | 73607          |
| 2                                                                            | patient centered care/ or ((patient* or consumer* or stakeholder* or user* or lay* or client* or citizen* or communit* or public or advoca* or carer* or caregiver* or surrogate* or relative) adj2 (important or perspective or centered or centred or participa* or collaborat* or partner* or voice* or unvoiced*)).ti,ab,kf.                                                                                                     | 196195         |
| 3                                                                            | ((patient* or consumer* or stakeholder* or user* or lay* or client* or citizen* or communit* or public or advoca* or carer* or caregiver* or surrogate* or relative) adj2 (involv* or represent* or consult* or contribut* or engage* or activat* or opinion* or dialog* or partner* or input*)).ti,ab,kf.                                                                                                                           | 217260         |
| 4                                                                            | *patient participation/ or *consumer participation/ or *patient advocacy/ or *consumer advocacy/ or (patient centred care or ((patient* or consumer* or stakeholder* or user* or lay* or client* or citizen* or communit* or public or advoca* or carer* or caregiver* or surrogate* or relative) adj2 (important or perspective or centered or centred or participa* or collaborat* or partner* or voice* or unvoiced*))).ti,ab,kf. | 217533         |
| 5                                                                            | ((patient* consumer* or stakeholder* or user* or lay* or client* or citizen* or communit* or public or advoca* or carer* or caregiver* or surrogate* or relative*) adj2 (involv* or represent* or consult* or contribute* or engage* or activat* or opinion* or dialog* or partner* or input*)).ti,ab,kf.                                                                                                                            | 77468          |
| 6                                                                            | *patient partner/ or *lived experience/ or person with lived experience.ti,ab,kf.                                                                                                                                                                                                                                                                                                                                                    | 34             |
| 7                                                                            | patient-centred care.ti,ab,kf.                                                                                                                                                                                                                                                                                                                                                                                                       | 3378           |
| 8                                                                            | or/1-7                                                                                                                                                                                                                                                                                                                                                                                                                               | 443221         |
| 9                                                                            | exp Sex/                                                                                                                                                                                                                                                                                                                                                                                                                             | 7739           |
| 10                                                                           | exp Gender/                                                                                                                                                                                                                                                                                                                                                                                                                          | 23958          |
| 11                                                                           | Sex Characteristics/                                                                                                                                                                                                                                                                                                                                                                                                                 | 61227          |
| 12                                                                           | Sex Factors/                                                                                                                                                                                                                                                                                                                                                                                                                         | 279154         |
| 13                                                                           | (sex or gender*).ti,ab,kf.                                                                                                                                                                                                                                                                                                                                                                                                           | 1037615        |
| 14                                                                           | (women or female*).ti,ab,kf.                                                                                                                                                                                                                                                                                                                                                                                                         | 2200650        |
| 15                                                                           | or/9-14                                                                                                                                                                                                                                                                                                                                                                                                                              | 2929924        |
| 16                                                                           | (heart or cardiac) adj2 (disease or surg* or patient?).ti,ab,kf.                                                                                                                                                                                                                                                                                                                                                                     | 341974         |
| 17                                                                           | exp Myocardial Ischemia/                                                                                                                                                                                                                                                                                                                                                                                                             | 470537         |
| 18                                                                           | ((coronary adj2 (arter* or stenosis* or atherosclerosis* or arteriosclerosis* or syndrome or microvascular)) or (coronary adj5 disease?) or CAD).ti,ab,kf.                                                                                                                                                                                                                                                                           | 351373         |
| 19                                                                           | (small adj2 (arter* or vessel*) adj2 disease*).ti,ab,kf.                                                                                                                                                                                                                                                                                                                                                                             | 6276           |
| 20                                                                           | (angina or stroke? or MINOCA or INOCA or SCAD or Kounis).ti,ab,kf.                                                                                                                                                                                                                                                                                                                                                                   | 372937         |
| 21                                                                           | ((heart or myocardial) adj3 infarct*).ti,ab,kf.                                                                                                                                                                                                                                                                                                                                                                                      | 230682         |
| 22                                                                           | (isch?emi* adj3 (heart or cardiac or myocardial)).ti,ab,kf.                                                                                                                                                                                                                                                                                                                                                                          | 98640          |
| 23                                                                           | ((heart or cardiac or coronary) adj2 (pain* or spasm* or vasospasm* or embolism*)).ti,ab,kf.                                                                                                                                                                                                                                                                                                                                         | 10511          |
| 24                                                                           | exp Myocardial Revascularization/                                                                                                                                                                                                                                                                                                                                                                                                    | 97356          |

**Supplemental Table S3. Search Strategies**

|    |                                                                                                                                                                                                                                                                           |         |
|----|---------------------------------------------------------------------------------------------------------------------------------------------------------------------------------------------------------------------------------------------------------------------------|---------|
| 25 | (((aortocoronary or coronary) adj3 bypass*) or CABG).ti,ab,kf.                                                                                                                                                                                                            | 59607   |
| 26 | (angioplast* or atherectom* or endarterectom* or thrombectom* or PCI or PTCA or (Percutaneous adj3 (intervent* or revascular*))).ti,ab,kf.                                                                                                                                | 136495  |
| 27 | exp Stroke/                                                                                                                                                                                                                                                               | 171950  |
| 28 | Stroke Rehabilitation/                                                                                                                                                                                                                                                    | 17411   |
| 29 | Cardiac Rehabilitation/                                                                                                                                                                                                                                                   | 3753    |
| 30 | ((brain* or cerebr* or cerebell* or vertebrobasilar or hemispher* or intracran* or intracerebral* or infratentorial* or supratentorial* or anterior circulation or posterior circulation or basal ganglia) adj5 (isch?emi* or infarct* or thrombo* or emboli*)).ti,ab,kf. | 125099  |
| 31 | ((brain* or cerebr* or cerebell* or intracerebral or intracran* or parenchymal or intraventricular or infratentorial or supratentorial or basal gangli*) adj5 (h?emorrhage* or h?ematoma* or bleed*)).ti,ab,kf.                                                           | 72725   |
| 32 | exp Heart Failure/                                                                                                                                                                                                                                                        | 146723  |
| 33 | exp Ventricular Dysfunction, Left/                                                                                                                                                                                                                                        | 35083   |
| 34 | ((heart or cardiac) adj2 (failure or resynchroni*)).ti,ab,kf.                                                                                                                                                                                                             | 232667  |
| 35 | (cardiomyopath* or Takotsubo or HFrEF or HFpEF).ti,ab,kf.                                                                                                                                                                                                                 | 96587   |
| 36 | or/16-35                                                                                                                                                                                                                                                                  | 1557988 |
| 37 | 8 and 15 and 36                                                                                                                                                                                                                                                           | 4537    |

**Supplemental Table S3. Search Strategies**

| <b>EMBASE</b>                                                                       |                                                                                                                                                                                                                                                                                                                                                                                                                                      |                |
|-------------------------------------------------------------------------------------|--------------------------------------------------------------------------------------------------------------------------------------------------------------------------------------------------------------------------------------------------------------------------------------------------------------------------------------------------------------------------------------------------------------------------------------|----------------|
| Database: EMBASE 1947 to 2023 June 19; Platform: Ovid; Date Searched: June 20, 2023 |                                                                                                                                                                                                                                                                                                                                                                                                                                      |                |
| <b>#</b>                                                                            | <b>Searches</b>                                                                                                                                                                                                                                                                                                                                                                                                                      | <b>Results</b> |
| 1                                                                                   | patient participation/ or consumer participation/ or patient advocacy/ or consumer advocacy/                                                                                                                                                                                                                                                                                                                                         | 121406         |
| 2                                                                                   | patient centered care/ or ((patient* or consumer* or stakeholder* or user* or lay* or client* or citizen* or communit* or public or advoca* or carer* or caregiver* or surrogate* or relative) adj2 (important or perspective or centered or centred or participa* or collaborat* or partner* or voice* or unvoiced*)).ti,ab,kw.                                                                                                     | 465763         |
| 3                                                                                   | ((patient* or consumer* or stakeholder* or user* or lay* or client* or citizen* or communit* or public or advoca* or carer* or caregiver* or surrogate* or relative) adj2 (involv* or represent* or consult* or contribut* or engage* or activat* or opinion* or dialog* or partner* or input*)).ti,ab,kw.                                                                                                                           | 314489         |
| 4                                                                                   | *patient participation/ or *consumer participation/ or *patient advocacy/ or *consumer advocacy/ or (patient centred care or ((patient* or consumer* or stakeholder* or user* or lay* or client* or citizen* or communit* or public or advoca* or carer* or caregiver* or surrogate* or relative) adj2 (important or perspective or centered or centred or participa* or collaborat* or partner* or voice* or unvoiced*))).ti,ab,kw. | 288730         |
| 5                                                                                   | ((patient* consumer* or stakeholder* or user* or lay* or client* or citizen* or communit* or public or advoca* or carer* or caregiver* or surrogate* or relative*) adj2 (involv* or represent* or consult* or contribute* or engage* or activat* or opinion* or dialog* or partner* or input*)).ti,ab,kw.                                                                                                                            | 95975          |
| 6                                                                                   | *patient partner/ or *lived experience/ or person with lived experience.ti,ab,kw.                                                                                                                                                                                                                                                                                                                                                    | 11917          |
| 7                                                                                   | patient-centred care.ti,ab,kw.                                                                                                                                                                                                                                                                                                                                                                                                       | 4561           |
| 8                                                                                   | or/1-7                                                                                                                                                                                                                                                                                                                                                                                                                               | 848720         |
| 9                                                                                   | exp Sex/                                                                                                                                                                                                                                                                                                                                                                                                                             | 468304         |
| 10                                                                                  | exp Gender/                                                                                                                                                                                                                                                                                                                                                                                                                          | 364210         |
| 11                                                                                  | Sex Characteristics/                                                                                                                                                                                                                                                                                                                                                                                                                 | 3353           |
| 12                                                                                  | Sex Factors/                                                                                                                                                                                                                                                                                                                                                                                                                         | 12393          |
| 13                                                                                  | (sex or gender*).ti,ab,kw.                                                                                                                                                                                                                                                                                                                                                                                                           | 1573764        |
| 14                                                                                  | (women or female*).ti,ab,kw.                                                                                                                                                                                                                                                                                                                                                                                                         | 3383700        |
| 15                                                                                  | or/9-14                                                                                                                                                                                                                                                                                                                                                                                                                              | 4554539        |
| 16                                                                                  | ((heart or cardiac) adj2 (disease or surg* or patient?)).ti,ab,kw.                                                                                                                                                                                                                                                                                                                                                                   | 511435         |
| 17                                                                                  | exp Myocardial Ischemia/                                                                                                                                                                                                                                                                                                                                                                                                             | 102986         |
| 18                                                                                  | ((coronary adj2 (arter* or stenosis* or atherosclerosis* or arteriosclerosis* or syndrome or microvascular)) or (coronary adj5 disease?) or CAD).ti,ab,kw.                                                                                                                                                                                                                                                                           | 521061         |
| 19                                                                                  | (small adj2 (arter* or vessel*) adj2 disease*).ti,ab,kw.                                                                                                                                                                                                                                                                                                                                                                             | 10304          |
| 20                                                                                  | (angina or stroke? or MINOCA or INOCA or SCAD or Kounis).ti,ab,kw.                                                                                                                                                                                                                                                                                                                                                                   | 603417         |
| 21                                                                                  | ((heart or myocardial) adj3 infarct*).ti,ab,kw.                                                                                                                                                                                                                                                                                                                                                                                      | 346863         |
| 22                                                                                  | (isch?emi* adj3 (heart or cardiac or myocardial)).ti,ab,kw.                                                                                                                                                                                                                                                                                                                                                                          | 143874         |
| 23                                                                                  | ((heart or cardiac or coronary) adj2 (pain* or spasm* or vasospasm* or embolism*)).ti,ab,kw.                                                                                                                                                                                                                                                                                                                                         | 15722          |
| 24                                                                                  | exp Myocardial Revascularization/                                                                                                                                                                                                                                                                                                                                                                                                    | 38588          |

**Supplemental Table S3. Search Strategies**

|    |                                                                                                                                                                                                                                                                           |         |
|----|---------------------------------------------------------------------------------------------------------------------------------------------------------------------------------------------------------------------------------------------------------------------------|---------|
| 25 | (((aortocoronary or coronary) adj3 bypass*) or CABG).ti,ab,kw.                                                                                                                                                                                                            | 87865   |
| 26 | (angioplast* or atherectom* or endarterectom* or thrombectom* or PCI or PTCA or (Percutaneous adj3 (intervent* or revascular*))).ti,ab,kw.                                                                                                                                | 225810  |
| 27 | exp Stroke/                                                                                                                                                                                                                                                               | 314607  |
| 28 | Stroke Rehabilitation/                                                                                                                                                                                                                                                    | 6990    |
| 29 | Cardiac Rehabilitation/                                                                                                                                                                                                                                                   | 16113   |
| 30 | ((brain* or cerebr* or cerebell* or vertebrobasilar or hemispher* or intracran* or intracerebral* or infratentorial* or supratentorial* or anterior circulation or posterior circulation or basal ganglia) adj5 (isch?emi* or infarct* or thrombo* or emboli*)).ti,ab,kw. | 186426  |
| 31 | ((brain* or cerebr* or cerebell* or intracerebral or intracran* or parenchymal or intraventricular or infratentorial or supratentorial or basal gangli*) adj5 (h?emorrhage* or h?ematoma* or bleed*)).ti,ab,kw.                                                           | 111213  |
| 32 | exp Heart Failure/                                                                                                                                                                                                                                                        | 672471  |
| 33 | exp Ventricular Dysfunction, Left/                                                                                                                                                                                                                                        | 40397   |
| 34 | ((heart or cardiac) adj2 (failure or resynchroni*)).ti,ab,kw.                                                                                                                                                                                                             | 388714  |
| 35 | (cardiomyopath* or Takotsubo or HFrEF or HFpEF).ti,ab,kw.                                                                                                                                                                                                                 | 163425  |
| 36 | or/16-35                                                                                                                                                                                                                                                                  | 2441735 |
| 37 | 8 and 15 and 36                                                                                                                                                                                                                                                           | 12014   |

**Supplemental Table S3. Search Strategies**

| <b>CINAHL</b>                                                                         |                                                                                                                                                                                                                                                                                                                                                                                                                                                                                                                                                                                                                                                                                                                                                                                                                                                |                |
|---------------------------------------------------------------------------------------|------------------------------------------------------------------------------------------------------------------------------------------------------------------------------------------------------------------------------------------------------------------------------------------------------------------------------------------------------------------------------------------------------------------------------------------------------------------------------------------------------------------------------------------------------------------------------------------------------------------------------------------------------------------------------------------------------------------------------------------------------------------------------------------------------------------------------------------------|----------------|
| Database: CINAHL Plus (from inception); Platform: EBSCO; Date Searched: June 20, 2023 |                                                                                                                                                                                                                                                                                                                                                                                                                                                                                                                                                                                                                                                                                                                                                                                                                                                |                |
| <b>#</b>                                                                              | <b>Searches</b>                                                                                                                                                                                                                                                                                                                                                                                                                                                                                                                                                                                                                                                                                                                                                                                                                                | <b>Results</b> |
| S1                                                                                    | (MH “patient participation”) or (MH “consumer participation”) or (MH “patient advocacy”) or (MH “consumer advocacy”)                                                                                                                                                                                                                                                                                                                                                                                                                                                                                                                                                                                                                                                                                                                           | 42400          |
| S2                                                                                    | TI ( ((patient centered care or patient* or consumer* or stakeholder* or user* or lay* or client* or citizen* or communit* or public or advoca* or carer* or caregiver* or surrogate* or relative) N2 (important or perspective or centered or centred or participa* or collaborat* or partner* or voice* or unvoiced*)) ) OR AB ( ((patient centered care or patient* or consumer* or stakeholder* or user* or lay* or client* or citizen* or communit* or public or advoca* or carer* or caregiver* or surrogate* or relative) N2 (important or perspective or centered or centred or participa* or collaborat* or partner* or voice* or unvoiced*)) )                                                                                                                                                                                       | 135918         |
| S3                                                                                    | TI ( ((patient* or consumer* or stakeholder* or user* or lay* or client* or citizen* or communit* or public or advoca* or carer* or caregiver* or surrogate* or relative) N2 (involv* or represent* or consult* or contribut* or engage* or activat* or opinion* or dialog* or partner* or input*)) ) OR AB ( ((patient* or consumer* or stakeholder* or user* or lay* or client* or citizen* or communit* or public or advoca* or carer* or caregiver* or surrogate* or relative) N2 (involv* or represent* or consult* or contribut* or engage* or activat* or opinion* or dialog* or partner* or input*)) )                                                                                                                                                                                                                                 | 111014         |
| S4                                                                                    | TI ( ((patient participation or consumer participation or patient advocacy or consumer advocacy or patient centred care or patient* or consumer* or stakeholder* or user* or lay* or client* or citizen* or communit* or public or advoca* or carer* or caregiver* or surrogate* or relative) N2 (important or perspective or centered or centred or participa* or collaborat* or partner* or voice* or unvoiced*)) ) OR AB ( ((patient participation or consumer participation or patient advocacy or consumer advocacy or patient centred care or patient* or consumer* or stakeholder* or user* or lay* or client* or citizen* or communit* or public or advoca* or carer* or caregiver* or surrogate* or relative) N2 (important or perspective or centered or centred or participa* or collaborat* or partner* or voice* or unvoiced*)) ) | 138144         |
| S5                                                                                    | TI ( ((patient* or consumer* or stakeholder* or user* or lay* or client* or citizen* or communit* or public or advoca* or carer* or caregiver* or surrogate* or relative*) N2 (involv* or represent* or consult* or contribute* or engage* or activat* or opinion* or dialog* or partner* or input*)) ) OR AB ( ((patient* or consumer* or stakeholder* or user* or lay* or client* or citizen* or communit* or public or advoca* or carer* or caregiver* or surrogate* or relative*) N2 (involv* or represent* or consult* or contribute* or engage* or activat* or opinion* or dialog* or partner* or input*)) )                                                                                                                                                                                                                             | 101893         |
| S6                                                                                    | TI ( (patient partner or lived experience or person with lived experience) ) OR AB ( (patient partner or lived experience or person with lived experience) )                                                                                                                                                                                                                                                                                                                                                                                                                                                                                                                                                                                                                                                                                   | 15083          |
| S7                                                                                    | TI “patient-centred care” OR AB “patient-centred care”                                                                                                                                                                                                                                                                                                                                                                                                                                                                                                                                                                                                                                                                                                                                                                                         | 1761           |
| S8                                                                                    | S1 OR S2 OR S3 OR S4 OR S5 OR S6 OR S7                                                                                                                                                                                                                                                                                                                                                                                                                                                                                                                                                                                                                                                                                                                                                                                                         | 264805         |
| S9                                                                                    | TI “sex” OR AB “sex”                                                                                                                                                                                                                                                                                                                                                                                                                                                                                                                                                                                                                                                                                                                                                                                                                           | 169793         |
| S10                                                                                   | TI “gender” OR AB “gender”                                                                                                                                                                                                                                                                                                                                                                                                                                                                                                                                                                                                                                                                                                                                                                                                                     | 150003         |
| S11                                                                                   | TI “Sex Characteristics” OR AB “Sex Characteristics”                                                                                                                                                                                                                                                                                                                                                                                                                                                                                                                                                                                                                                                                                                                                                                                           | 157            |
| S12                                                                                   | TI “Sex Factors” OR AB “Sex Factors”                                                                                                                                                                                                                                                                                                                                                                                                                                                                                                                                                                                                                                                                                                                                                                                                           | 50             |
| S13                                                                                   | TI “sex* gender*” or AB “sex* gender*”                                                                                                                                                                                                                                                                                                                                                                                                                                                                                                                                                                                                                                                                                                                                                                                                         | 705            |

**Supplemental Table S3. Search Strategies**

|     |                                                                                                                                                                                                                                                                                                                                                                                                                                                                                                                                                      |        |
|-----|------------------------------------------------------------------------------------------------------------------------------------------------------------------------------------------------------------------------------------------------------------------------------------------------------------------------------------------------------------------------------------------------------------------------------------------------------------------------------------------------------------------------------------------------------|--------|
| S14 | TI “women* female*” or AB “women* female*”                                                                                                                                                                                                                                                                                                                                                                                                                                                                                                           | 166    |
| S15 | S9 OR S10 OR S11 OR S12 OR S13 OR S14                                                                                                                                                                                                                                                                                                                                                                                                                                                                                                                | 308974 |
| S16 | TI ( ((heart or cardiac) N2 (disease or surg* or patient*)) ) OR AB ( ((heart or cardiac) N2 (disease or surg* or patient*)) )                                                                                                                                                                                                                                                                                                                                                                                                                       | 111502 |
| S17 | (MH “Myocardial Ischemia+”)                                                                                                                                                                                                                                                                                                                                                                                                                                                                                                                          | 113376 |
| S18 | TI ( ((coronary) N2 (arter* or stenosis* or atherosclerosis* or arteriosclerosis* or syndrome or microvascular)) ) or (coronary) N5 (disease or CAD)) ) OR AB ( ((coronary) N2 (arter* or stenosis* or atherosclerosis* or arteriosclerosis* or syndrome or microvascular)) ) or (coronary) N5 (disease or CAD)) )                                                                                                                                                                                                                                   | 92490  |
| S19 | TI ( ((small) N2 (arter* or vessel*) N2 (disease*)) ) OR AB ( ((small) N2 (arter* or vessel*) N2 (disease*)) )                                                                                                                                                                                                                                                                                                                                                                                                                                       | 1960   |
| S20 | TI ( (angina or stroke or MINOCA or INOCA or SCAD or Kounis) ) OR AB ( (angina or stroke or MINOCA or INOCA or SCAD or Kounis) )                                                                                                                                                                                                                                                                                                                                                                                                                     | 123687 |
| S21 | TI ( ((heart or myocardial) N3 (infarct*)) ) OR AB ( ((heart or myocardial) N3 (infarct*)) )                                                                                                                                                                                                                                                                                                                                                                                                                                                         | 53411  |
| S22 | TI ( ((isch or emi*) N3 (heart or cardiac or myocardial)) ) OR AB ( ((isch or emi*) N3 (heart or cardiac or myocardial)) )                                                                                                                                                                                                                                                                                                                                                                                                                           | 855    |
| S23 | TI ( ((heart or cardiac or coronary) N2 (pain* or spasm* or vasospasm* or embolism*)) ) OR AB ( ((heart or cardiac or coronary) N2 (pain* or spasm* or vasospasm* or embolism*)) )                                                                                                                                                                                                                                                                                                                                                                   | 3198   |
| S24 | (MH Myocardial Revascularization+”)                                                                                                                                                                                                                                                                                                                                                                                                                                                                                                                  | 25673  |
| S25 | TI ( ((aortocoronary or coronary) N3 (bypass* or CABG)) ) OR AB ( ((aortocoronary or coronary) N3 (bypass* or CABG)) )                                                                                                                                                                                                                                                                                                                                                                                                                               | 12539  |
| S26 | TI ( ((angioplast* or atherectomy* or endarterectomy* or thrombectomy* or PCI or PTCA or Percutaneous) N3 (intervent* or revascular*)) ) OR AB ( ((angioplast* or atherectomy* or endarterectomy* or thrombectomy* or PCI or PTCA or Percutaneous) N3 (intervent* or revascular*)) )                                                                                                                                                                                                                                                                 | 17291  |
| S27 | (MH “Stroke+”)                                                                                                                                                                                                                                                                                                                                                                                                                                                                                                                                       | 79163  |
| S28 | (MH “Stroke Rehabilitation”)                                                                                                                                                                                                                                                                                                                                                                                                                                                                                                                         | 12498  |
| S29 | TI “Cardiac Rehabilitation” OR AB “Cardiac Rehabilitation”                                                                                                                                                                                                                                                                                                                                                                                                                                                                                           | 4685   |
| S30 | TI ( ((brain* or cerebr* or cerebell* or vertebrobasilar or hemispher* or intracran* or intracerebral* or infratentorial* or supratentorial* or anterior circulation or posterior circulation or basal ganglia) N5 (isch* or emi* or infarct* or thrombo* or emboli*)) ) OR AB ( ((brain* or cerebr* or cerebell* or vertebrobasilar or hemispher* or intracran* or intracerebral* or infratentorial* or supratentorial* or anterior circulation or posterior circulation or basal ganglia) N5 (isch* or emi* or infarct* or thrombo* or emboli*)) ) | 25484  |
| S31 | TI ( ((brain* or cerebr* or cerebell* or intracerebral or intracran* or parenchymal or intraventricular or infratentorial or supratentorial or basal gangli*) N5 (hemorrhage* or hematoma* or bleed*)) ) OR AB ( ((brain* or cerebr* or cerebell* or intracerebral or intracran* or parenchymal or intraventricular or infratentorial or supratentorial or basal gangli*) N5 (hemorrhage* or hematoma* or bleed*)) )                                                                                                                                 | 15291  |
| S32 | (MH “Heart Failure+”)                                                                                                                                                                                                                                                                                                                                                                                                                                                                                                                                | 49006  |
| S33 | (MH “Ventricular Dysfunction, Left+”)                                                                                                                                                                                                                                                                                                                                                                                                                                                                                                                | 11182  |
| S34 | TI ( ((heart or cardiac) N2 (failure or resynchroni*)) ) OR AB ( ((heart or cardiac) N2 (failure or resynchroni*)) )                                                                                                                                                                                                                                                                                                                                                                                                                                 | 69311  |

**Supplemental Table S3. Search Strategies**

|     |                                                                                                                                          |        |
|-----|------------------------------------------------------------------------------------------------------------------------------------------|--------|
| S35 | TI ( (cardiomyopath* or Takotsubo or HFrEF or HFpEF) ) OR AB ( (cardiomyopath* or Takotsubo or HFrEF or HFpEF) )                         | 23084  |
| S36 | S16 OR S17 OR S18 OR S19 OR S20 OR S21 OR S22 OR S23 OR S24 OR S25 OR S26 OR S27 OR S28 OR S29 OR S30 OR S31 OR S32 OR S33 OR S34 OR S35 | 439245 |
| S37 | S8 AND S15 AND S36                                                                                                                       | 1361   |

**Supplemental Table S3. Search Strategies**

| <b>Cochrane Central Register of Controlled Trials and Cochrane Database of Systematic Reviews Search</b> |                                                                                                                                                                                                                                                                                                                                                                                                 |                |
|----------------------------------------------------------------------------------------------------------|-------------------------------------------------------------------------------------------------------------------------------------------------------------------------------------------------------------------------------------------------------------------------------------------------------------------------------------------------------------------------------------------------|----------------|
| Database: Cochrane Library; Date Searched: June 20, 2023                                                 |                                                                                                                                                                                                                                                                                                                                                                                                 |                |
| <b>#</b>                                                                                                 | <b>Searches</b>                                                                                                                                                                                                                                                                                                                                                                                 | <b>Results</b> |
| 1                                                                                                        | patient participation or consumer participation or patient advocacy or consumer advocacy                                                                                                                                                                                                                                                                                                        | 19141          |
| 2                                                                                                        | patient centered care or patient or consumer or stakeholder or user or lay or client or citizen or communit or public or advoca or carer or caregiver or surrogate or relative adj2 important or perspective or centered or centred or participa or collaborat or partner or voice or unvoiced:ti,ab                                                                                            | 553180         |
| 3                                                                                                        | patient or consumer or stakeholder or user or lay or client or citizen or communit or public or advoca or carer or caregiver or surrogate or relative adj2 involv or represent or consult or contribut or engage or activat or opinion or dialog or partner or input:ti,ab                                                                                                                      | 563445         |
| 4                                                                                                        | patient participation or consumer participation or patient advocacy or consumer advocacy or patient centred care or patient or consumer or stakeholder or user or lay or client or citizen or communit or public or advoca or carer or caregiver or surrogate or relative adj2 important or perspective or centered or centred or participa or collaborat or partner or voice or unvoiced:ti,ab | 553180         |
| 5                                                                                                        | patient consumer or stakeholder or user or lay or client or citizen or communit or public or advoca or carer or cargiver or surrogate or relative adj2 involv or represent or consult or contribute or engage or activat or opinion or dialog or partner or input:ti,ab                                                                                                                         | 147265         |
| 6                                                                                                        | patient partner or lived experience or person with lived experience:ti,ab                                                                                                                                                                                                                                                                                                                       | 3889           |
| 7                                                                                                        | patient-centred care:ti,ab                                                                                                                                                                                                                                                                                                                                                                      | 3484           |
| 8                                                                                                        | 1 or 2 or 3 or 4 or 5 or 6                                                                                                                                                                                                                                                                                                                                                                      | 1945928        |
| 9                                                                                                        | exp Sex                                                                                                                                                                                                                                                                                                                                                                                         | 2877           |
| 10                                                                                                       | exp Gender                                                                                                                                                                                                                                                                                                                                                                                      | 3054           |
| 11                                                                                                       | Sex Characteristics                                                                                                                                                                                                                                                                                                                                                                             | 11320          |
| 12                                                                                                       | Sex Factors                                                                                                                                                                                                                                                                                                                                                                                     | 22701          |
| 13                                                                                                       | sex or gender:ti,ab                                                                                                                                                                                                                                                                                                                                                                             | 99192          |
| 14                                                                                                       | women or female:ti,ab                                                                                                                                                                                                                                                                                                                                                                           | 264798         |
| 15                                                                                                       | 9 or 10 or 11 or 12 or 13 or 14                                                                                                                                                                                                                                                                                                                                                                 | 1541707        |
| 16                                                                                                       | heart or cardiac adj2 disease or surg or patient:ti,ab                                                                                                                                                                                                                                                                                                                                          | 478878         |
| 17                                                                                                       | exp Myocardial Ischemia                                                                                                                                                                                                                                                                                                                                                                         | 301            |
| 18                                                                                                       | coronary adj2 arter or stenosis or atheroscleros or arterioscleros or syndrome or microvascular or coronary adj5 disease or CAD:ti,ab                                                                                                                                                                                                                                                           | 121569         |
| 19                                                                                                       | small adj2 arter or vessel adj2 disease:ti,ab                                                                                                                                                                                                                                                                                                                                                   | 123            |
| 20                                                                                                       | angina or stroke or MINOCA or INOCA or SCAD or Kounis:ti,ab                                                                                                                                                                                                                                                                                                                                     | 95362          |
| 21                                                                                                       | heart or myocardial adj3 infarct:ti,ab                                                                                                                                                                                                                                                                                                                                                          | 186287         |
| 22                                                                                                       | ischemi adj3 heart or cardiac or myocardial:ti,ab                                                                                                                                                                                                                                                                                                                                               | 105891         |
| 23                                                                                                       | heart or cardiac or coronary adj2 pain or spasm or vasospasm or embolism:ti,ab                                                                                                                                                                                                                                                                                                                  | 221820         |
| 24                                                                                                       | exp Myocardial Revascularization                                                                                                                                                                                                                                                                                                                                                                | 86             |
| 25                                                                                                       | aortocoronary or coronary adj3 bypass or CABG:ti,ab                                                                                                                                                                                                                                                                                                                                             | 6952           |

**Supplemental Table S3. Search Strategies**

|    |                                                                                                                                                                                                                                                    |         |
|----|----------------------------------------------------------------------------------------------------------------------------------------------------------------------------------------------------------------------------------------------------|---------|
| 26 | angioplast or atherectom or endarterectom or thrombectom or PCI or PTCA or Percutaneous adj3 intervent or revascular:ti,ab                                                                                                                         | 11455   |
| 27 | exp Stroke                                                                                                                                                                                                                                         | 1436    |
| 28 | Stroke Rehabilitation                                                                                                                                                                                                                              | 15583   |
| 29 | Cardiac Rehabilitation                                                                                                                                                                                                                             | 5178    |
| 30 | brain or cerebr or cerebell or vertebrobasilar or hemispher or intracran or intracerebral or infratentorial or supratentorial or anterior circulation or posterior circulation or basal ganglia adj5 ischemi or infarct or thrombo or emboli:ti,ab | 89597   |
| 31 | brain or cerebr or cerebell or intracerebral or intracran or parenchymal or intraventricular or infratentorial or supratentorial or basal gangli adj5 hemorrhage or hematoma or bleed:ti,ab                                                        | 92399   |
| 32 | exp Heart Failure                                                                                                                                                                                                                                  | 1541    |
| 33 | exp Ventricular Dysfunction, Left                                                                                                                                                                                                                  | 181     |
| 34 | heart or cardiac adj2 failure or resynchroni:ti,ab                                                                                                                                                                                                 | 186358  |
| 35 | cardiomyopath or Takotsubo or HFrEF or HFpEF:ti,ab                                                                                                                                                                                                 | 2168    |
| 36 | 16 or 17 or 18 or 19 or 20 or 21 or 22 or 23 or 24 or 25 or 26 or 27 or 28 or 29 or 30 or 31 or 32 or 33 or 34 or 35                                                                                                                               | 2035152 |
| 37 | 8 and 15 and 36                                                                                                                                                                                                                                    | 36072   |

**Supplemental Table S3. Search Strategies**

| <b>APA PsycInfo Search</b>                                                          |                                                                                                                                                                                                                                                                                                                                                                                                                                   |                |
|-------------------------------------------------------------------------------------|-----------------------------------------------------------------------------------------------------------------------------------------------------------------------------------------------------------------------------------------------------------------------------------------------------------------------------------------------------------------------------------------------------------------------------------|----------------|
| APA PsycInfo 1806 to June Week 2 2023; Platform: Ovid; Date Searched: June 20, 2023 |                                                                                                                                                                                                                                                                                                                                                                                                                                   |                |
| <b>#</b>                                                                            | <b>Searches</b>                                                                                                                                                                                                                                                                                                                                                                                                                   | <b>Results</b> |
| 1                                                                                   | patient participation/ or consumer participation/ or patient advocacy/ or consumer advocacy/                                                                                                                                                                                                                                                                                                                                      | 3140           |
| 2                                                                                   | patient centered care/ or ((patient* or consumer* or stakeholder* or user* or lay* or client* or citizen* or communit* or public or advoca* or carer* or caregiver* or surrogate* or relative) adj2 (important or perspective or centered or centred or participa* or collaborat* or partner* or voice* or unvoiced*)).ti,ab.                                                                                                     | 67074          |
| 3                                                                                   | ((patient* or consumer* or stakeholder* or user* or lay* or client* or citizen* or communit* or public or advoca* or carer* or caregiver* or surrogate* or relative) adj2 (involv* or represent* or consult* or contribut* or engage* or activat* or opinion* or dialog* or partner* or input*)).ti,ab.                                                                                                                           | 71676          |
| 4                                                                                   | *patient participation/ or *consumer participation/ or *patient advocacy/ or *consumer advocacy/ or (patient centred care or ((patient* or consumer* or stakeholder* or user* or lay* or client* or citizen* or communit* or public or advoca* or carer* or caregiver* or surrogate* or relative) adj2 (important or perspective or centered or centred or participa* or collaborat* or partner* or voice* or unvoiced*))).ti,ab. | 68271          |
| 5                                                                                   | ((patient* consumer* or stakeholder* or user* or lay* or client* or citizen* or communit* or public or advoca* or carer* or caregiver* or surrogate* or relative*) adj2 (involv* or represent* or consult* or contribute* or engage* or activat* or opinion* or dialog* or partner* or input*)).ti,ab.                                                                                                                            | 42683          |
| 6                                                                                   | *patient partner/ or *lived experience/ or person with lived experience.ti,ab.                                                                                                                                                                                                                                                                                                                                                    | 24             |
| 7                                                                                   | patient-centred care.ti,ab.                                                                                                                                                                                                                                                                                                                                                                                                       | 584            |
| 8                                                                                   | or/1-7                                                                                                                                                                                                                                                                                                                                                                                                                            | 128169         |
| 9                                                                                   | exp Sex/                                                                                                                                                                                                                                                                                                                                                                                                                          | 128127         |
| 10                                                                                  | Gender/                                                                                                                                                                                                                                                                                                                                                                                                                           | 0              |
| 11                                                                                  | Sex Characteristics/                                                                                                                                                                                                                                                                                                                                                                                                              | 0              |
| 12                                                                                  | Sex Factors/                                                                                                                                                                                                                                                                                                                                                                                                                      | 0              |
| 13                                                                                  | (sex or gender*).ti,ab.                                                                                                                                                                                                                                                                                                                                                                                                           | 426801         |
| 14                                                                                  | (women or female*).ti,ab.                                                                                                                                                                                                                                                                                                                                                                                                         | 606458         |
| 15                                                                                  | or/9-14                                                                                                                                                                                                                                                                                                                                                                                                                           | 857264         |
| 16                                                                                  | ((heart or cardiac) adj2 (disease or surg* or patient?)).ti,ab.                                                                                                                                                                                                                                                                                                                                                                   | 15374          |
| 17                                                                                  | exp cardiovascular disorders/                                                                                                                                                                                                                                                                                                                                                                                                     | 71231          |
| 18                                                                                  | ((coronary adj2 (arter* or stenosis* or atherosclerosis* or arteriosclerosis* or syndrome or microvascular)) or (coronary adj5 disease?) or CAD).ti,ab.                                                                                                                                                                                                                                                                           | 9409           |
| 19                                                                                  | (small adj2 (arter* or vessel*) adj2 disease*).ti,ab.                                                                                                                                                                                                                                                                                                                                                                             | 1209           |
| 20                                                                                  | (angina or stroke? or MINOCA or INOCA or SCAD or Kounis).ti,ab.                                                                                                                                                                                                                                                                                                                                                                   | 40002          |
| 21                                                                                  | ((heart or myocardial) adj3 infarct*).ti,ab.                                                                                                                                                                                                                                                                                                                                                                                      | 4653           |
| 22                                                                                  | (isch?emi* adj3 (heart or cardiac or myocardial)).ti,ab.                                                                                                                                                                                                                                                                                                                                                                          | 1807           |
| 23                                                                                  | ((heart or cardiac or coronary) adj2 (spasm* or vasospasm* or embolism*)).ti,ab.                                                                                                                                                                                                                                                                                                                                                  | 57             |
| 24                                                                                  | ((aortocoronary or coronary) adj3 bypass*) or CABG).ti,ab.                                                                                                                                                                                                                                                                                                                                                                        | 1053           |

**Supplemental Table S3. Search Strategies**

|    |                                                                                                                                                                                                                                                                        |       |
|----|------------------------------------------------------------------------------------------------------------------------------------------------------------------------------------------------------------------------------------------------------------------------|-------|
| 25 | (angioplast* or atherectom* or endarterectom* or thrombectom* or PCI or PTCA or (Percutaneous adj3 (intervent* or revascular*))).ti,ab.                                                                                                                                | 1699  |
| 26 | exp Stroke/                                                                                                                                                                                                                                                            | 24453 |
| 27 | Stroke Rehabilitation/                                                                                                                                                                                                                                                 | 0     |
| 28 | Cardiac Rehabilitation/                                                                                                                                                                                                                                                | 0     |
| 29 | ((brain* or cerebr* or cerebell* or vertebrobasilar or hemispher* or intracran* or intracerebral* or infratentorial* or supratentorial* or anterior circulation or posterior circulation or basal ganglia) adj5 (isch?emi* or infarct* or thrombo* or emboli*)).ti,ab. | 10548 |
| 30 | ((brain* or cerebr* or cerebell* or intracerebral or intracran* or parenchymal or intraventricular or infratentorial or supratentorial or basal gangli*) adj5 (h?emorrhage* or h?ematoma* or bleed*)).ti,ab.                                                           | 4463  |
| 31 | Heart Failure/                                                                                                                                                                                                                                                         | 0     |
| 32 | Ventricular Dysfunction, Left/                                                                                                                                                                                                                                         | 0     |
| 33 | ((heart or cardiac) adj2 (failure or resynchroni*)).ti,ab.                                                                                                                                                                                                             | 4625  |
| 34 | (cardiomyopath* or Takotsubo or HFrEF or HFpEF).ti,ab.                                                                                                                                                                                                                 | 939   |
| 35 | or/16-34                                                                                                                                                                                                                                                               | 97001 |
| 36 | 8 and 15 and 35                                                                                                                                                                                                                                                        | 680   |
